# Supplementary material for: Rare earth halide double perovskites for high-performance resistive random access memory
Source: Royal Society of Chemistry journal article supplement (doi:10.1039/d3tc00350g), 2023-01-01
Supplement: d3tc00350g1.pdf [file d3tc00350g1.pdf]

Supporting information for

# Rare Earth Halide Double Perovskite for High-Performance Resistive Random-Access Memory

Tong Tong, ‡, <sup>b</sup> Chang Liu, ‡, <sup>a</sup> Jing Xu, <sup>a</sup> Huihua Min, \*, <sup>d</sup> Su Chen, <sup>c</sup> Yinong Lyu, \*, <sup>a</sup> Chongguang Lyu, \*, <sup>a</sup>

<sup>a</sup>The State Key Laboratory of Materials-Oriented Chemical Engineering, College of Materials Science and Engineering, Jiangsu Collaborative Innovation Center for Advanced Inorganic Function Composites, Jiangsu National Synergetic Innovation Center for Advanced Materials (SICAM), Nanjing Tech University, Nanjing, 210009, China

<sup>b</sup>Key Laboratory of Flexible Electronics (KLOFE) & Institute of Advanced Materials (IAM), Nanjing Tech University (Nanjing Tech), 30 South Puzhu Road, Nanjing 211816, China.

<sup>c</sup>State Key Laboratory of Materials-Oriented Chemical Engineering, College of Chemical Engineering, Jiangsu Key Laboratory of Fine Chemicals and Functional Polymer Materials, Nanjing Tech University Nanjing, 210009, China

<sup>d</sup>Electron Microscope Laboratory, Nanjing Forestry University, Nanjing 210037, China

‡ These authors contributed equally to this article.

Correspondence should be addressed to Huihua Min: [hhmin@njfu.edu.cn](mailto:hhmin@njfu.edu.cn), Yinong Lyu: [yinonglu@njtech.edu.cn](mailto:yinonglu@njtech.edu.cn) and Chongguang Lyu: [iamcgly@njtech.edu.cn](mailto:iamcgly@njtech.edu.cn)

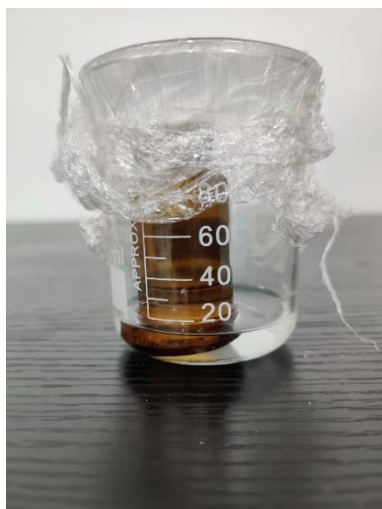

(a)

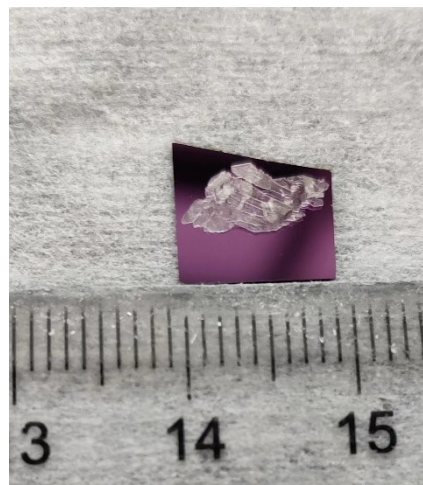

(b)

**Fig. S1** (a) the anti-solvent crystallization process of Cs<sub>2</sub>AgEuBr<sub>6</sub> single crystal and (b) real top-view image of as-obtained white transparent Cs<sub>2</sub>AgEuBr<sub>6</sub> single crystal.

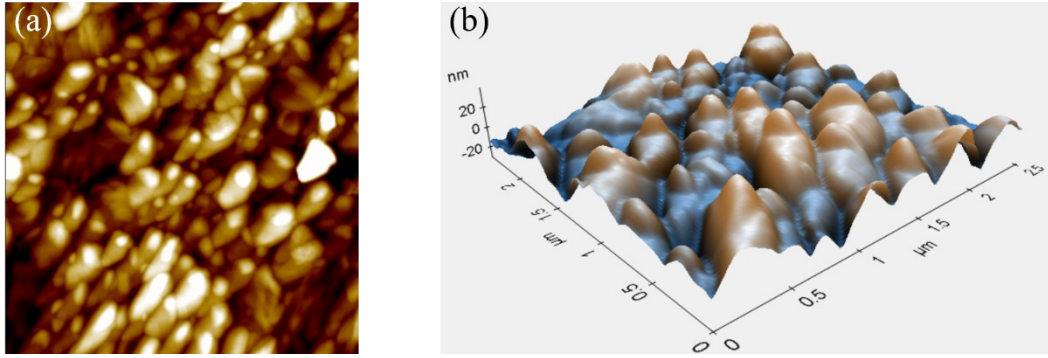

**Fig. S2** (a) AFM and (b) 3D AFM image of  $\text{Cs}_2\text{AgEuBr}_6$  film

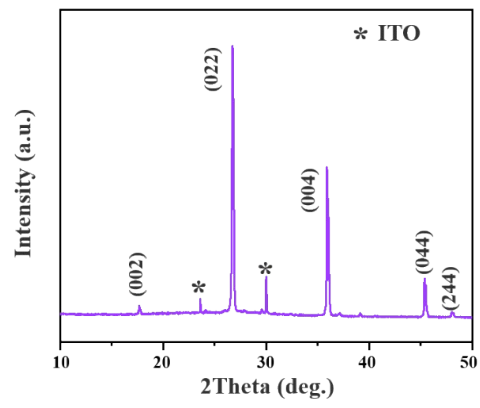

**Fig. S3** XRD pattern of  $\text{Cs}_2\text{AgEuBr}_6$  film

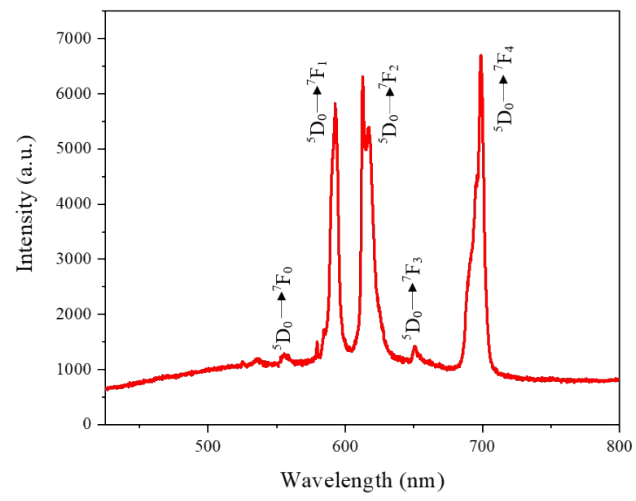

**Fig. S4** PL spectrum of Cs<sub>2</sub>AgEuBr<sub>6</sub> film

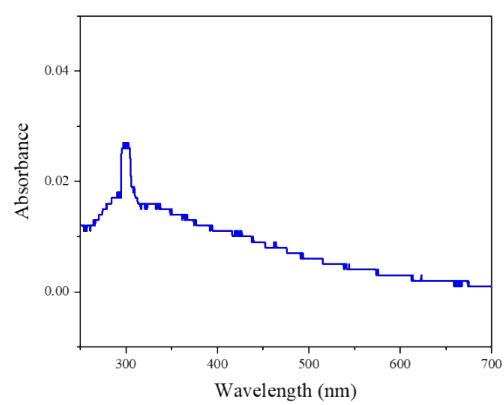

**Fig. S5** UV-vis absorption spectrum of Cs<sub>2</sub>AgEuBr<sub>6</sub> film

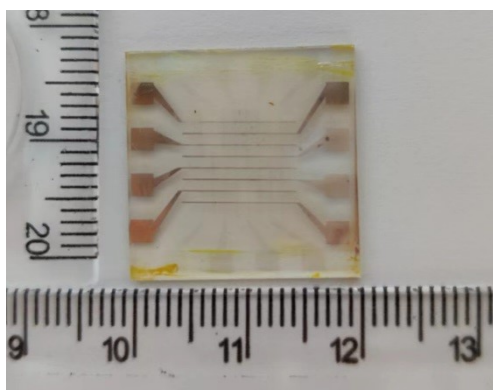

**Fig. S6** Real top-view image of a typical Au/Cs<sub>2</sub>AgEuBr<sub>6</sub>/ITO memory device

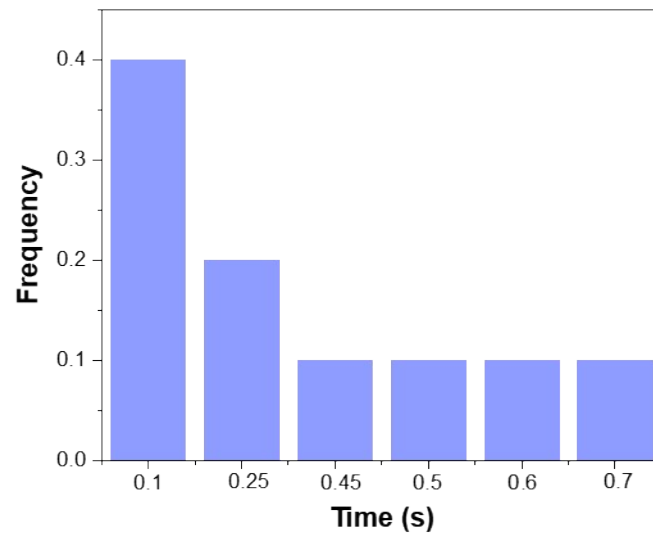

**Fig. S7** The switching speed statistics of 10 unit cells



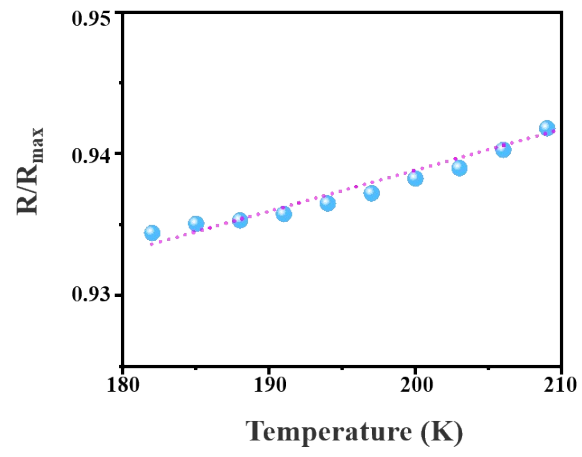

**Fig. S8** Resistance of Au/Cs<sub>2</sub>AgEuBr<sub>6</sub>/ITO device at different temperature

Table S1 Comparison of Cs<sub>2</sub>AgEuBr<sub>6</sub>-based memristor with previous works

| Structure                                                                     | ON/OFF ratio    | Retention time (s) | Ref.             |
|-------------------------------------------------------------------------------|-----------------|--------------------|------------------|
| Lead-free perovskite-based device                                             |                 |                    |                  |
| Au/Cs <sub>2</sub> AgEuBr <sub>6</sub> /ITO                                   | 10 <sup>4</sup> | 12000              | <b>This Work</b> |
| Au/ Cs <sub>2</sub> AgBiBr <sub>6</sub> /ITO                                  | 10 <sup>3</sup> | 100000             | 1                |
| Ag/PMMA/AgBiI <sub>4</sub> /ITO                                               | 10 <sup>4</sup> | 10000              | 2                |
| Al/CsBi <sub>3</sub> I <sub>10</sub> /ITO                                     | 10 <sup>3</sup> | 10000              | 3                |
| Lead-contained perovskite-based device                                        |                 |                    |                  |
| Au/CH <sub>3</sub> NH <sub>3</sub> PbI <sub>3</sub> /ITO                      | 10 <sup>2</sup> | 10000              | 4                |
| Au/CH <sub>3</sub> NH <sub>3</sub> PbI <sub>3</sub> -XCIX/FTO                 | 10 <sup>4</sup> | 40000              | 5                |
| Ag/CH <sub>3</sub> NH <sub>3</sub> PbI <sub>3</sub> /Pt                       | 10 <sup>6</sup> | 11000              | 6                |
| Au/CH <sub>3</sub> NH <sub>3</sub> PbClX <sub>3</sub> -X/ Ti/TiO <sub>2</sub> | 20              | 25000              | 7                |

## References

1. X. F. Cheng, W.-H. Qian, J. Wang, C. Yu, J. H. He, H. Li, Q. F. Xu, D. Y. Chen, N. J. Li and J.-M. Lu, *Small*, 2019, **15**, 1905731.
2. H. Ye, B. Sun, Z. Wang, Z. Liu, X. Zhang, X. Tan, T. Shi, Z. Tang and G. Liao, *J. Mater. Chem. C*, 2020, **8**, 14155-14163.
3. Z. Xiong, W. Hu, Y. She, Q. Lin, L. Hu, X. Tang and K. Sun, *ACS Appl. Mater. Interfaces*, 2019, **11**, 30037-30044.
4. C. Gu and J.-S. Lee, *ACS Nano*, 2016, **10**, 5413-5418.
5. F. Zhou, Y. Liu, X. Shen, M. Wang, F. Yuan and Y. Chai, *Adv. Funct. Mater.*, 2018, **28**, 1800080.
6. J. Choi, S. Park, J. Lee, K. Hong, D.-H. Kim, C. W. Moon, G. D. Park, J. Suh, J. Hwang, S. Y. Kim, H. S. Jung, N.-G. Park, S. Han, K. T. Nam and H. W. Jang, *Adv. Mater.*, 2016, **28**, 6562-6567.

7. K. Yan, B. Chen, H. Hu, S. Chen, B. Dong, X. Gao, X. Xiao, J. Zhou and D. Zou,  
*Adv. Electron. Mater.*, 2016, **2**, 1600160
